# Supplementary material for: Human iPSC-derived neural stem cells displaying radial glia signature exhibit long-term safety in mice
Source: Springer Nature journal article supplement (doi:10.1038/s41467-024-53613-7), 2024-11-01
Supplement: MOESM1 [file 41467_2024_53613_MOESM1_ESM.pdf]

## **Supplementary information**

### **• Supplementary Figures**

Supplementary Figure 1. Expression of NSC markers and predicted TF network in hiPSC-NSCs..

Supplementary Figure 2. Transcription factors upregulated during hiPSC neural differentiation.

Supplementary Figure 3. Analyses of transcription factors downregulated during hiPSC neural commitment and RG markers expressed in hiPSC-NSCs.

Supplementary Figure 4. Validation of ChIP-seq analysis in hiPSCs, hiPSC-NSCs, and hfNSCs.

Supplementary Figure 5. Comparable activation of cell cycle and metabolic pathways in hiPSC-NSCs and hfNSCs.

Supplementary Figure 6. Single-cell RNA-seq analyses in hiPSC-NSCs and hfNSCs.

Supplementary Figure 7. Engrafted hiPSC-NSCs migrate along the rostro-caudal axis and primarily differentiate into glia progenitors.

Supplementary Figure 8. Molecular analyses in SREBP1-deficient cells.

Supplementary Figure 9. Sample gating strategies in flow cytometry analyses.

### **• Supplementary Tables**

Supplementary Table 1. Summary of hiPSC clones generated by reprogramming of healthy donor (HD) fibroblasts.

Supplementary Table 2. Upstream regulators identified by Ingenuity Pathway Analysis (IPA) on RNA-seq analysis of hiPSC-NPCs vs. hiPSCs.

Supplementary Table 3. Upstream regulators identified by Ingenuity Pathway Analysis (IPA) on the dataset of genes close to hiPSC- and hiPSC-NSC-specific enhancers

Supplementary Table 4. Upstream regulators identified by Ingenuity Pathway Analysis (IPA) on RNA-seq analysis of hiPSC-NSCs vs. hfNSCs.

Supplementary Table 5. List of gRNAs and primers used for PCR amplification and sequencing of Cas9 on-target sequence. Sequencing results showing the Cas9-nuclease edited sequences (SREBF1 exon 5) in SREBP1-deficient clones.

Supplementary Table 6. List of primers used for qRT-PCR on immunoprecipitated chromatin.

Supplementary Table 7. List of primers and probes used for SYBR Green and TaqMan qRT-PCR.

Supplementary Table 8. List of primary and secondary antibodies with antigen, host species, provider, product number, and working dilutions indicated.

## Supplementary figures

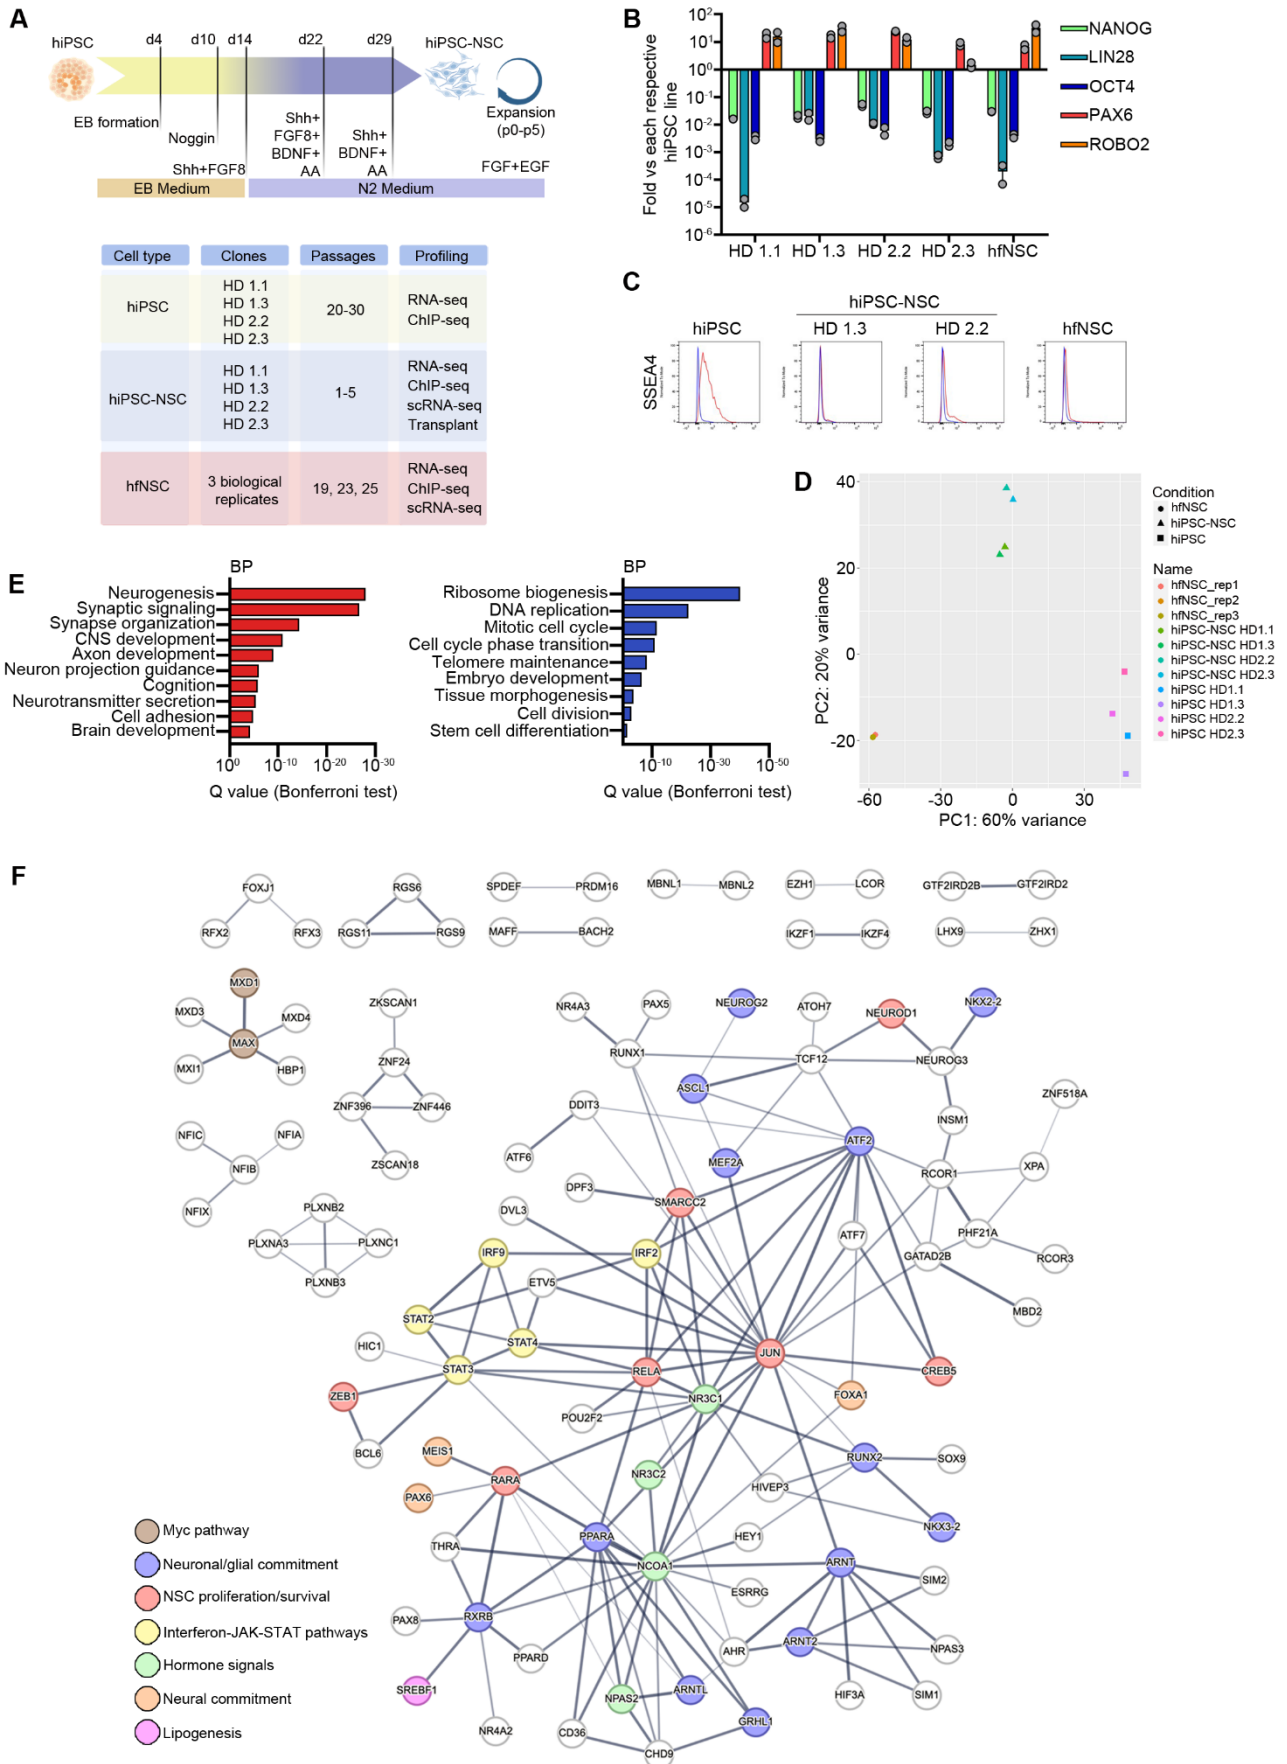

**Supplementary Figure 1. Expression of NSC markers and predicted TF network in hiPSC-NSCs.** **A)** Schematic representation of neural differentiation protocol. Timepoints analyzed in this study correspond to: (i) different stages of hiPSC-to-NSC commitment (hiPSCs, day 0; Embryoid bodies, day 4; early and late rosette-like formations, days 10 and 14; hiPSC-NSC maturation, days 22 and 29); (ii) hiPSC-NSC expansion in growth media (passages 0-5). Cell types, clones, passages and -OMICS/functional analyses are reported. Created in BioRender. Garsia, C. (2023) [BioRender.com/v791313](https://www.biorender.com/v791313). **B)** Bar plot showing the upregulation of NSC markers (*PAX6*, *ROBO2*) and downregulation of hiPSC markers (*NANOG*, *LIN28*, *OCT4*) in hiPSC-NSCs at levels similar to hfNSCs. For each gene, the expression levels in hiPSC-NSCs are reported as fold changes vs. the corresponding parental hiPSC clone, whereas expression levels in hfNSCs are reported as fold changes vs. the mean values in hiPSC clones. Data are expressed as mean  $\pm$  SEM of  $n = 2$  independent experiments. **C)** Representative FACS plots of SSEA4 (pluripotency marker) expression in hiPSCs, hiPSC-NSCs (clones HD 1.3 and HD 2.2), and hfNSCs. Blue lines, unstained cells; red lines, stained cells. **D)** Principal Component Analysis (PCA) plot of RNA-seq samples comparing hiPSCs vs. hiPSC-NSCs vs. hfNSCs. **E)** Bar plots of biological processes upregulated (red bars) or downregulated (blue bars) in hiPSC-NSCs vs. hiPSCs. **F)** Protein-protein interaction network functional enrichment analysis (STRING) of TFs upregulated in hiPSC-NSCs vs. hiPSCs ( $\log_2$  fold change  $\pm 1$ , adjusted  $p$ -value  $< 0.05$ ). Proteins are colored according to NSC functions defined based on published data. **B-F)** Analyses were performed in hiPSCs clones HD 1.1, HD 1.3, HD 2.2, and HD 2.3 (p20-30); hiPSC-NSC clones HD 1.1 (p3), HD 1.3 (p5), HD 2.2 (p3), and HD 2.3 (p4); hfNSCs: three biological replicates at different passages (p19, p23, p25). Source data are provided as a Source Data file.

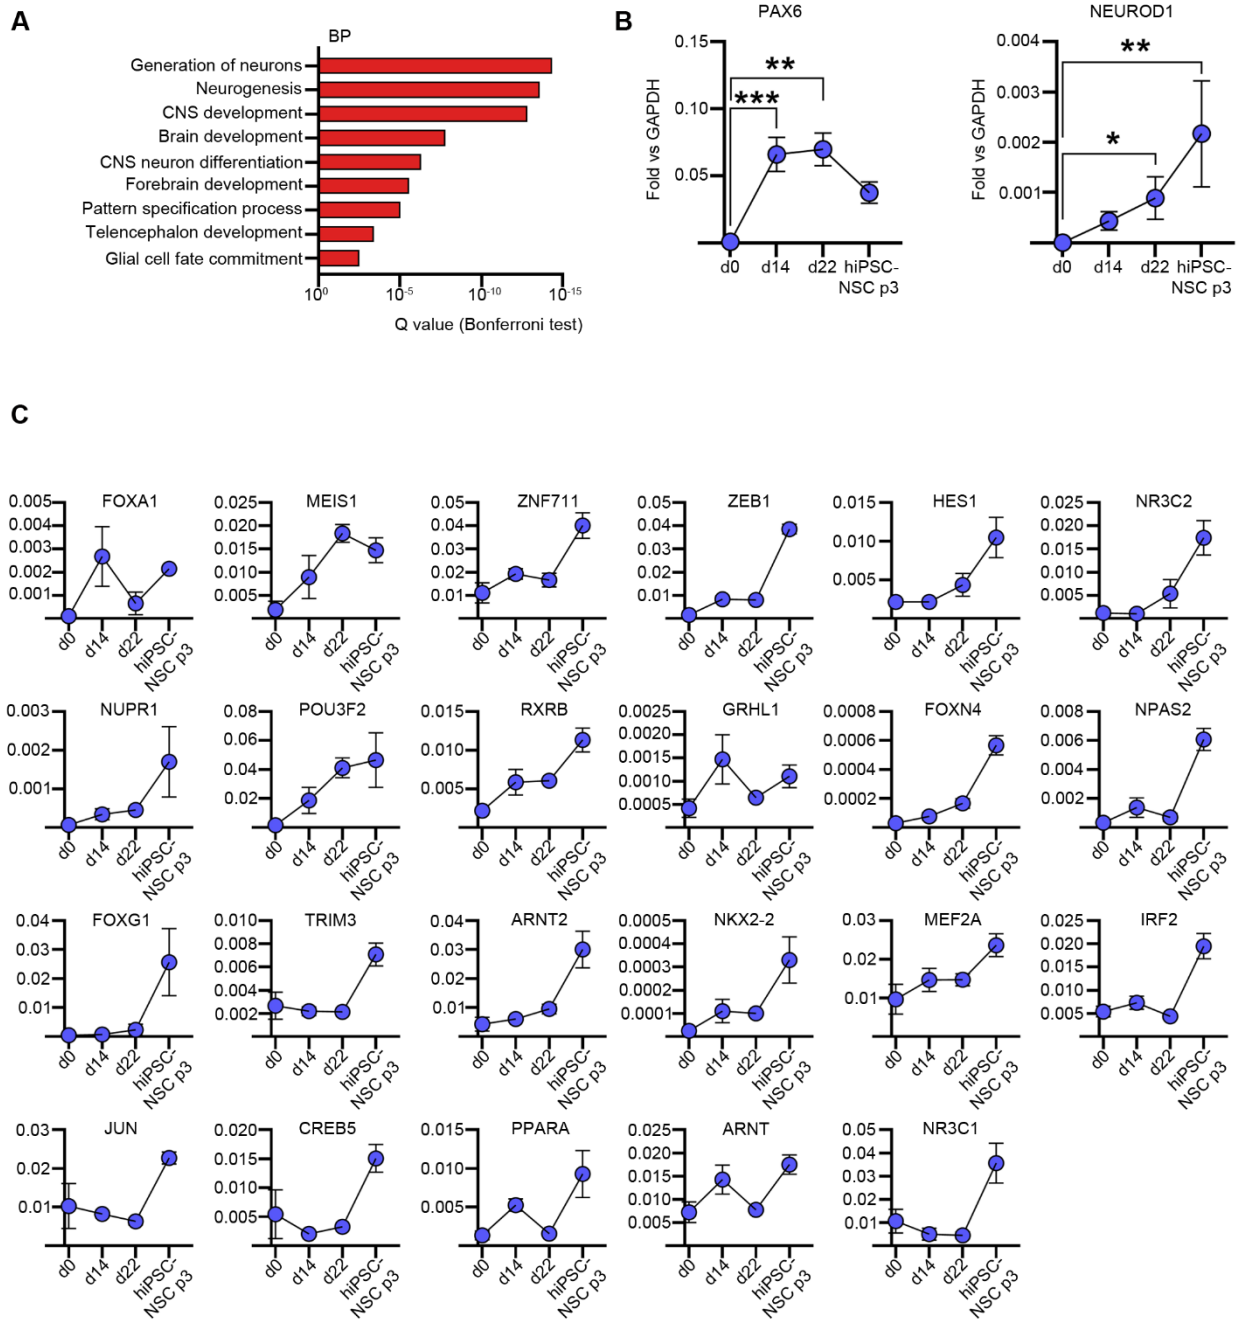

**Supplementary Figure 2. Transcription factors upregulated during hiPSC neural differentiation.** **A)** Gene ontology enrichment analysis of transcription factors upregulated in hiPSC-NSCs as compared to parental hiPSCs ( $\log_2$  fold change  $> 1$ , adjusted  $p$ -value  $< 0.05$ ). Bar plot shows selected biological processes upregulated in hiPSC-NSCs. **B)** qRT-PCR analysis of *PAX6* and *NEUROD1* expression during hiPSC neural differentiation. Expression levels are normalized on the housekeeping gene *GAPDH*. Each dot represents the mean  $\pm$  SEM of at least n=5 biological replicates/time point. One-way ANOVA followed by Dunn's multiple comparison test: \*,  $p < 0.05$ ; \*\*,  $p < 0.01$ ; \*\*\*,  $p < 0.001$ . **C)** Time-course qRT-PCR analysis showing the expression of TFs during hiPSC-to-NSC differentiation. Expression levels are normalized on the housekeeping gene *GAPDH*. Each dot represents the mean  $\pm$  SEM of at least n=2 biological replicates/time point. **B-C)** Timepoints analyzed: hiPSCs (day 0), rosette-like formations (day 14), hiPSC-NSC maturation (day 22), and hiPSC-NSCs at passage 3. **A-C)** Analyses were performed in hiPSC clones HD 1.1, HD 1.3, HD 2.2, and HD 2.3 (p20-30); hiPSC-NSC clones HD 1.1 (p3), HD 1.3 (p5), HD 2.2 (p3), and HD 2.3 (p4). Source data are provided as a Source Data file.

**A**

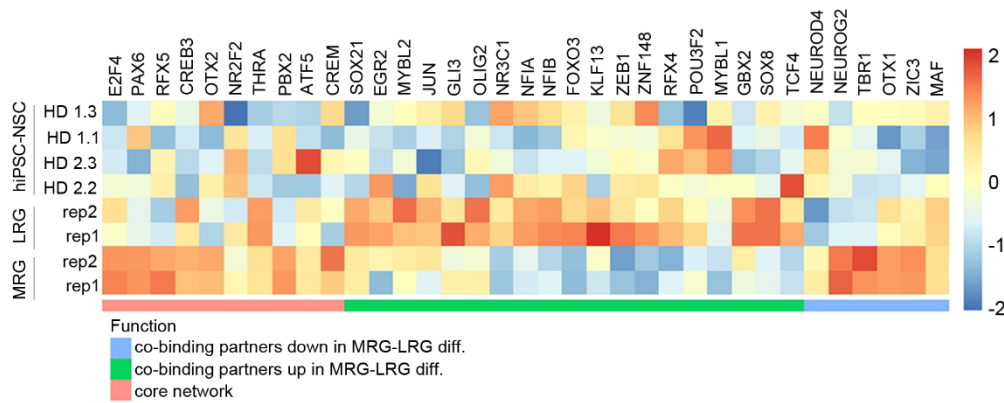

**B**

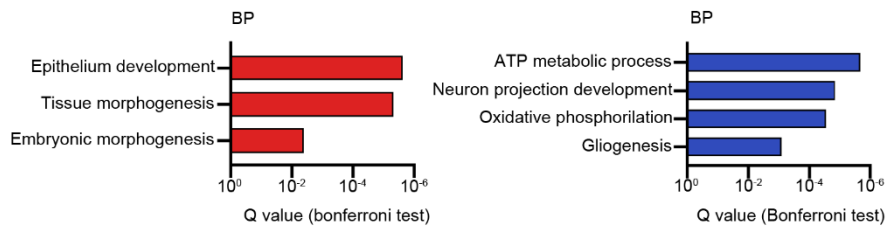

**C**

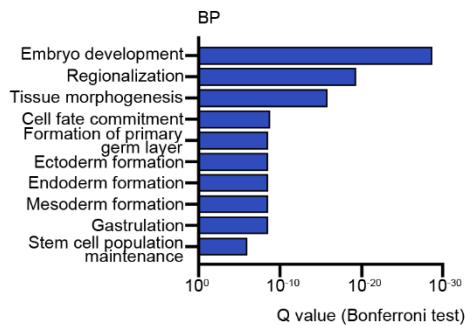

**D**

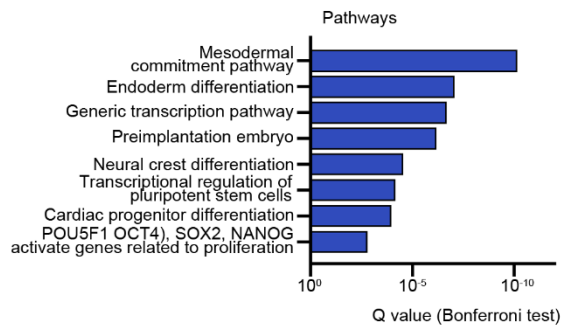

**E**

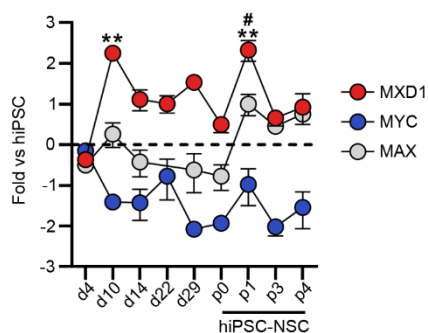

**Supplementary Figure 3. Analyses of transcription factors downregulated during hiPSC neural commitment and RG markers expressed in hiPSC-NSCs.** **A)** Heatmap showing the expression levels of core and co-binding TFs regulating ESC neural commitment<sup>77</sup> in hiPSC-NSCs as compared to ESC-derived MRG and LRG. Color scale indicates the average expression levels of these genes in each cell population (blue, low; red, high). **B)** Bar plots showing selected biological processes based on gene ontology enrichment analysis of upregulated (red bars) and downregulated (blue bars) genes in hiPSC-NSCs vs. ESC-derived LRG<sup>77</sup> ( $\log_2$  fold change  $\pm 1$ , adjusted  $p$ -value  $< 0.05$ ). **C-D)** Gene ontology enrichment analysis of transcription factors downregulated in hiPSC-NSCs as compared to parental hiPSCs ( $\log_2$  fold change  $> 1$ , adjusted  $p$ -value  $< 0.05$ ). Bar plot shows selected biological processes (C) and pathways (D). **E)** qRT-PCR analysis of *MYC*, *MAX*, and *MXD1* expression during hiPSC-to-hiPSC-NSC transition (timepoints analyzed: Embryoid bodies (day 4), early and late rosette-like formations (days 10 and 14), hiPSC-NSC maturation (days 22 and 29), and hiPSC-NSC at passages 0,1,3 and 4). Expression levels are normalized on the housekeeping gene *GAPDH*.

Each dot represents the mean  $\pm$  SEM of at least n=3 biological replicates/time point. One-way ANOVA followed by Dunn's multiple comparison test: \*\*,  $p < 0.01$  (vs. d4); #,  $p < 0.05$  (vs. hiPSC-NSC p0). **A-E)** Analyses were performed in hiPSCs clones [HD 1.1, HD 1.3, HD 2.2, and HD 2.3 (p20-30)] and/or hiPSC-NSC clones [HD 1.1 (p3), HD 1.3 (p5), HD 2.2 (p3), and HD 2.3 (p4)]. Source data are provided as a Source Data file.

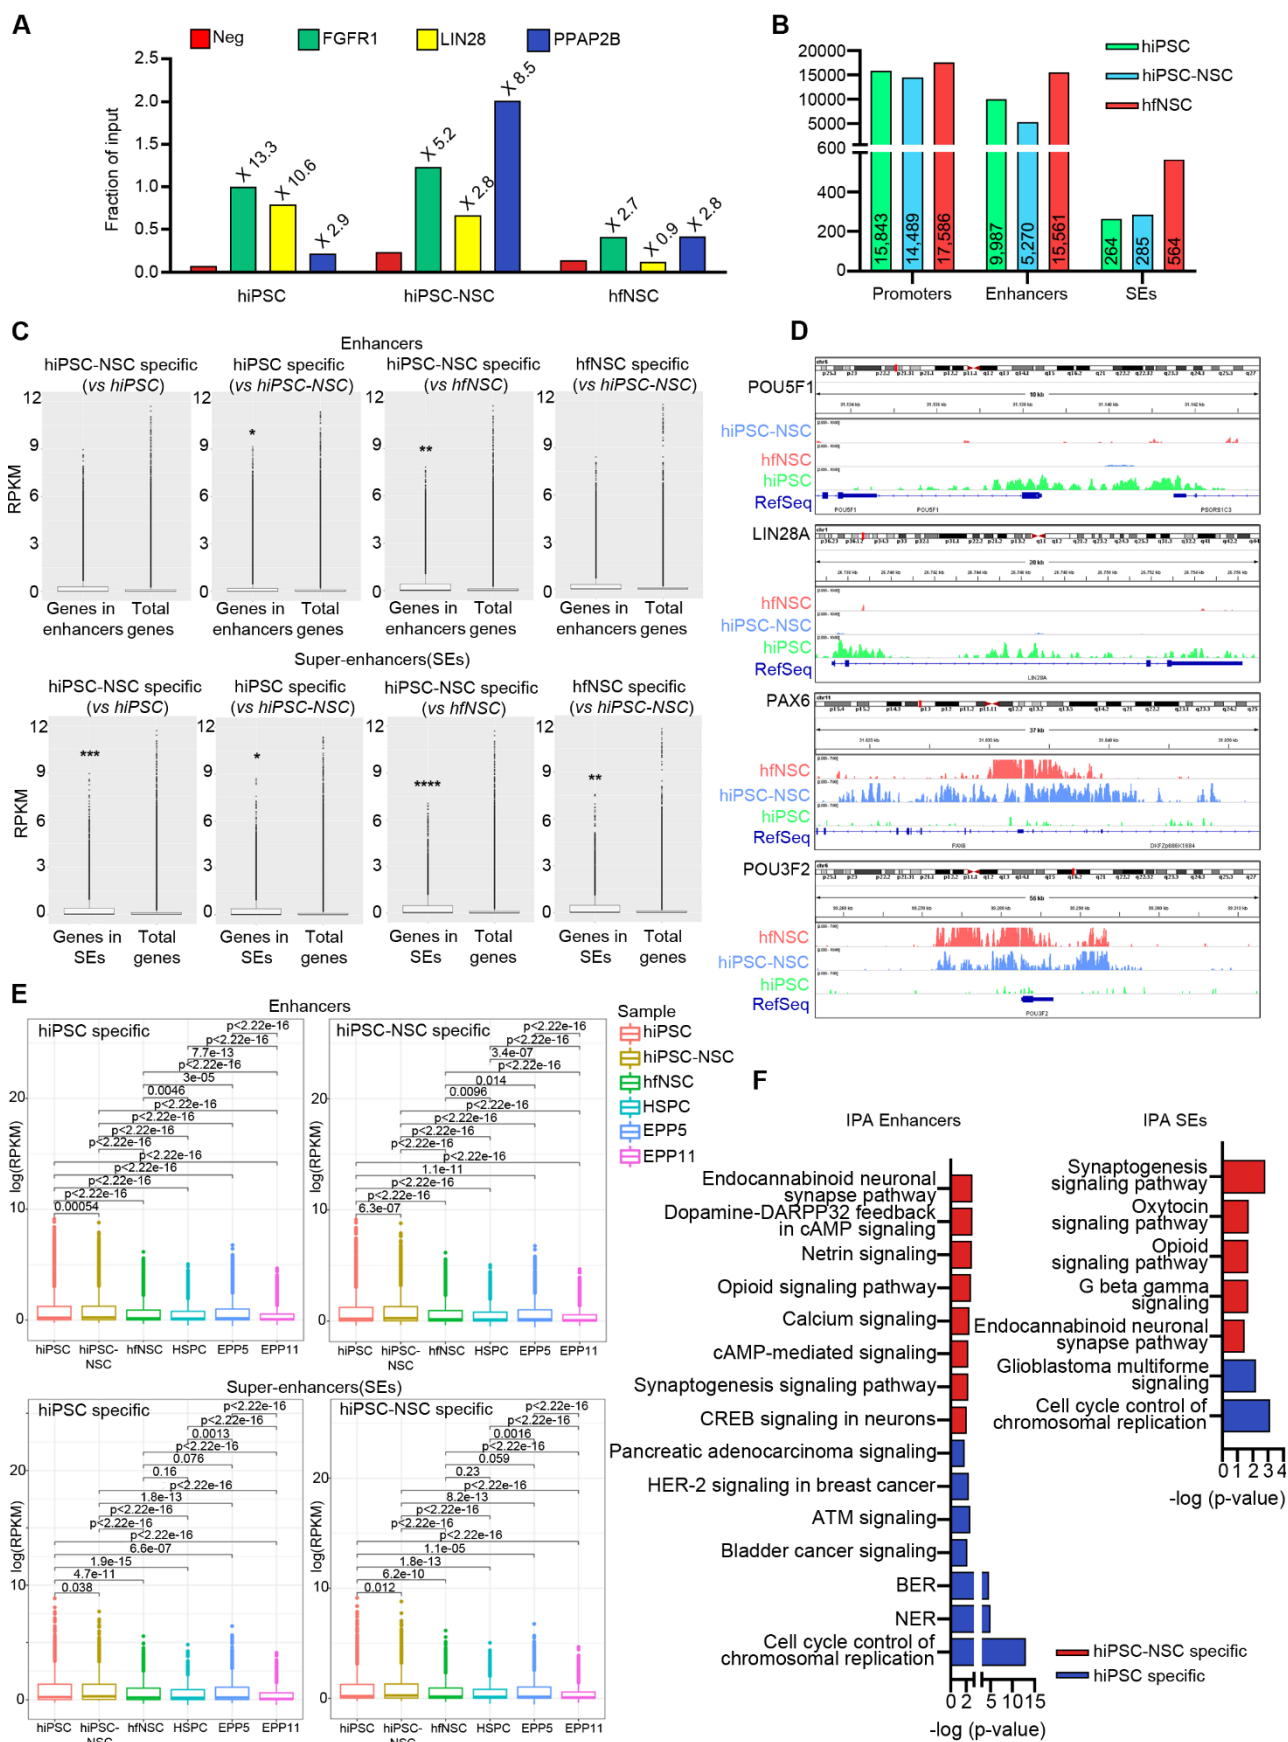

change vs. the corresponding input sample (fraction of input). Enrichment on negative fraction (background) is indicated. **B)** Bar plot showing the number of H3K27ac<sup>+</sup> reads corresponding to promoters, enhancers, and SEs identified in each cell population. In each bar are indicated the numbers of H3K27Ac<sup>+</sup> reads. **C)** Box plot of expression levels (Reads Per Kilobase Million; RPKM) of genes close to cell-specific enhancers and SEs in comparison with total gene expression levels in each cell population. Welch Two-sample t-test, \*,  $p\text{-adj} < 0.05$ ; \*\*,  $p\text{-adj} < 0.01$ ; \*\*\*,  $p < 0.001$ , \*\*\*\*,  $p\text{-adj} < 0.0001$  **D)** Integrative Genomic Viewer (IGV) snapshot of H3K27ac<sup>+</sup> peaks at pluripotent (*POU5F1*, *LIN28A*) and NSC (*PAX6*, *POU3F2*) genes in hiPSCs, hiPSC-NSCs, and hfNSCs. Genomic scale and RefSeq gene are indicated. **E)** Box plot of expression levels (logRPKM) of genes close to hiPSC- and hiPSC-NSC-specific enhancers and SEs detected in the comparison of hiPSC and hiPSC-NSC ChIP-seq datasets. To verify the specificity of selected regulatory regions, the expression levels of selected genes were evaluated in published RNA-seq datasets retrieved from human stem/progenitor cells (HSPC) and erythroid progenitor/precursor cells at different stages of maturation (EPP5: day 5, EPP11: day 11)<sup>90</sup>. Pairwise Wilcoxon test was used to determine significant differences in the expression values between different cell types. **F)** Bar plots showing the IPA analysis of up- and down-regulated genes (log<sub>2</sub> fold change  $\pm 1$ , adjusted  $p$ -value  $< 0.05$ ) close to cell-specific enhancers (left plots) and SEs (right plots) in hiPSCs (blue bars) or hiPSC-NSCs (red bars). **A-F)** Analyses were performed in hiPSCs clones HD 1.1, HD 1.3, HD 2.2, and HD 2.3 (p20-30); hiPSC-NSC clones HD 1.1 (p3), HD 1.3 (p5), HD 2.2 (p3), and HD 2.3 (p4); hfNSCs: three biological replicates at different passages (p19, p23, p25). Source data are provided as a Source Data file.



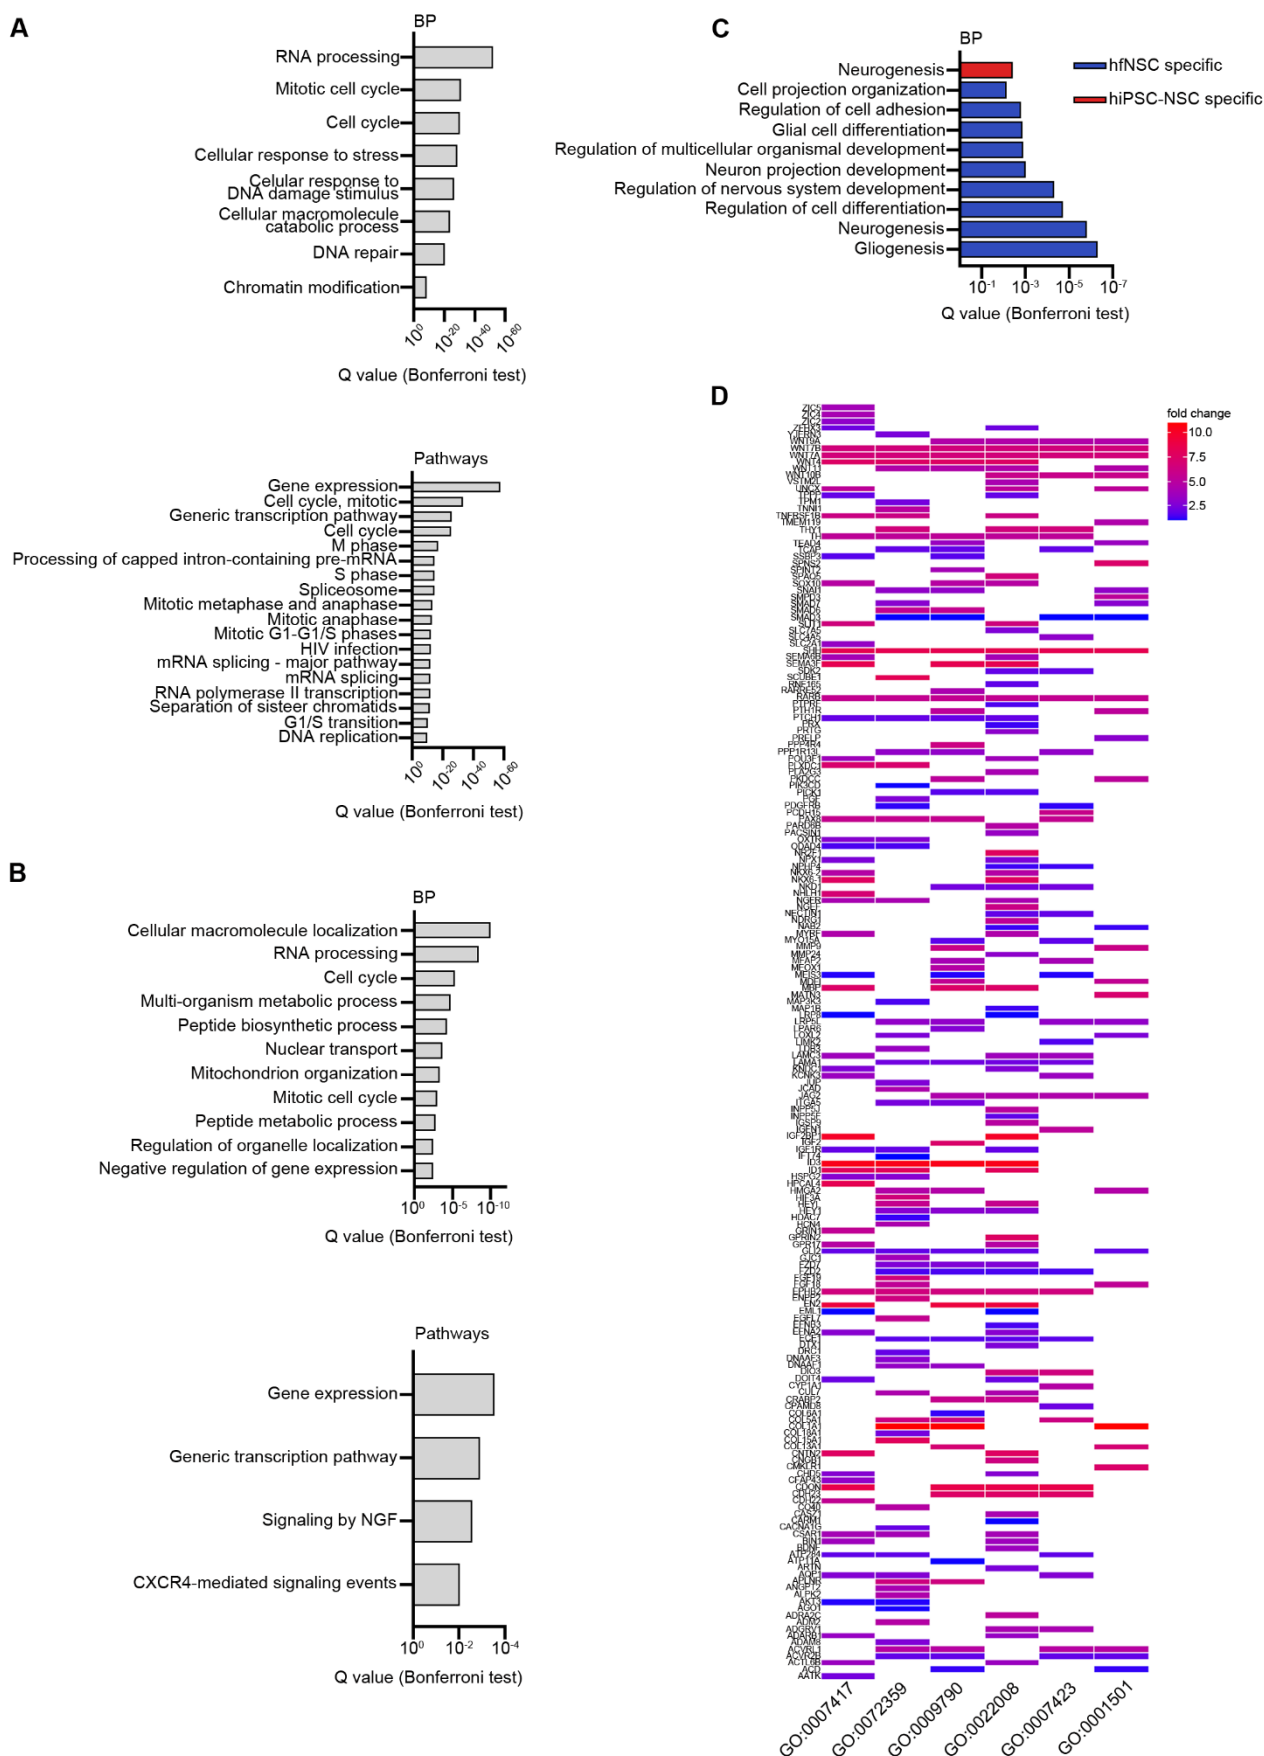

enrichment analysis of genes close to common enhancers in hiPSC-NSCs and hfNSCs. Bar plots show selected BP (upper plots) and pathways (lower plots) similarly activated in the two neural populations. **C)** Bar plot showing BP associated with genes close to hiPSC-NSC-specific (red bar) and hfNSC-specific (blue bars) SEs. **D)** Heatmap of Cluster Profiler analysis showing genes shared among GO terms associated with neural (GO:0007417, GO:0022008) and non-neural (GO:0072359, GO:0009790, GO:0007423, GO:0001501) biological processes. Fold change enrichment is indicated by the color scale (white, low; red, high). **A-D)** Analyses were performed in hiPSC-NSC clones HD 1.1 (p3), HD 1.3 (p5), HD 2.2 (p3), and HD 2.3 (p4); hfNSCs: three biological replicates at different passages (p19, p23, p25). Source data are provided as a Source Data file.



markers of cell populations isolated from fetal human brain (ventricular RG, vRG; outer RG, oRG; Pre-OPC; Intermediate Progenitors, IP; inhibitory neurons, InhNeurons; excitatory neurons, ExcNeurons)<sup>118</sup>. Expression is depicted according to the color scale (blue, low; red, high). **C)** Heatmap indicating the expression levels of the top 50 genes along the pseudotime trajectory from Cluster 1 to Cluster 7. Expression is depicted according to the color scale (blue, low; red, high). **D)** UMAP plots showing the distribution of cells expressing membrane-bound markers (*ACKR3*, *NTRK2*, *L1CAM*) in *PAX6*<sup>+</sup> early RG, *SLC1A3*<sup>+</sup> mature RG, *OLIG2*<sup>+</sup> OPC and *DCX*<sup>+</sup> neuronal progenitors. *LOXL2* has been identified as a marker of glia progenitors. **E)** Immunofluorescence analyses showing the expression of PAX6, GBX2, LOXL2, L1CAM and ACKR3 proteins in hiPSC-NSCs. Expression is depicted according to the color scale (green, low; red, high). **F)** UMAP plot of top 50 genes that identify hiPSC-NSC/hfNSC-derived mature RG (Clusters 3-6 and 11) and committed progenitors (clusters 7, 10) in scRNA-seq datasets of human fetal brain tissues<sup>118</sup>. Expression is depicted according to the color scale (blue, low; red, high). **G)** UMAP plot showing minimal expression of hiPSC-associated markers (*CNMD*, *DPPA4*, and *LITDI*) in scRNA-seq samples. Expression is depicted according to the color scale (green, low; red, high). **A-G)** Analyses were performed in hiPSC-NSC clones HD 1.1 (p2), HD 1.3 (p1), and HD 2.3 (p2); hfNSCs (p19).

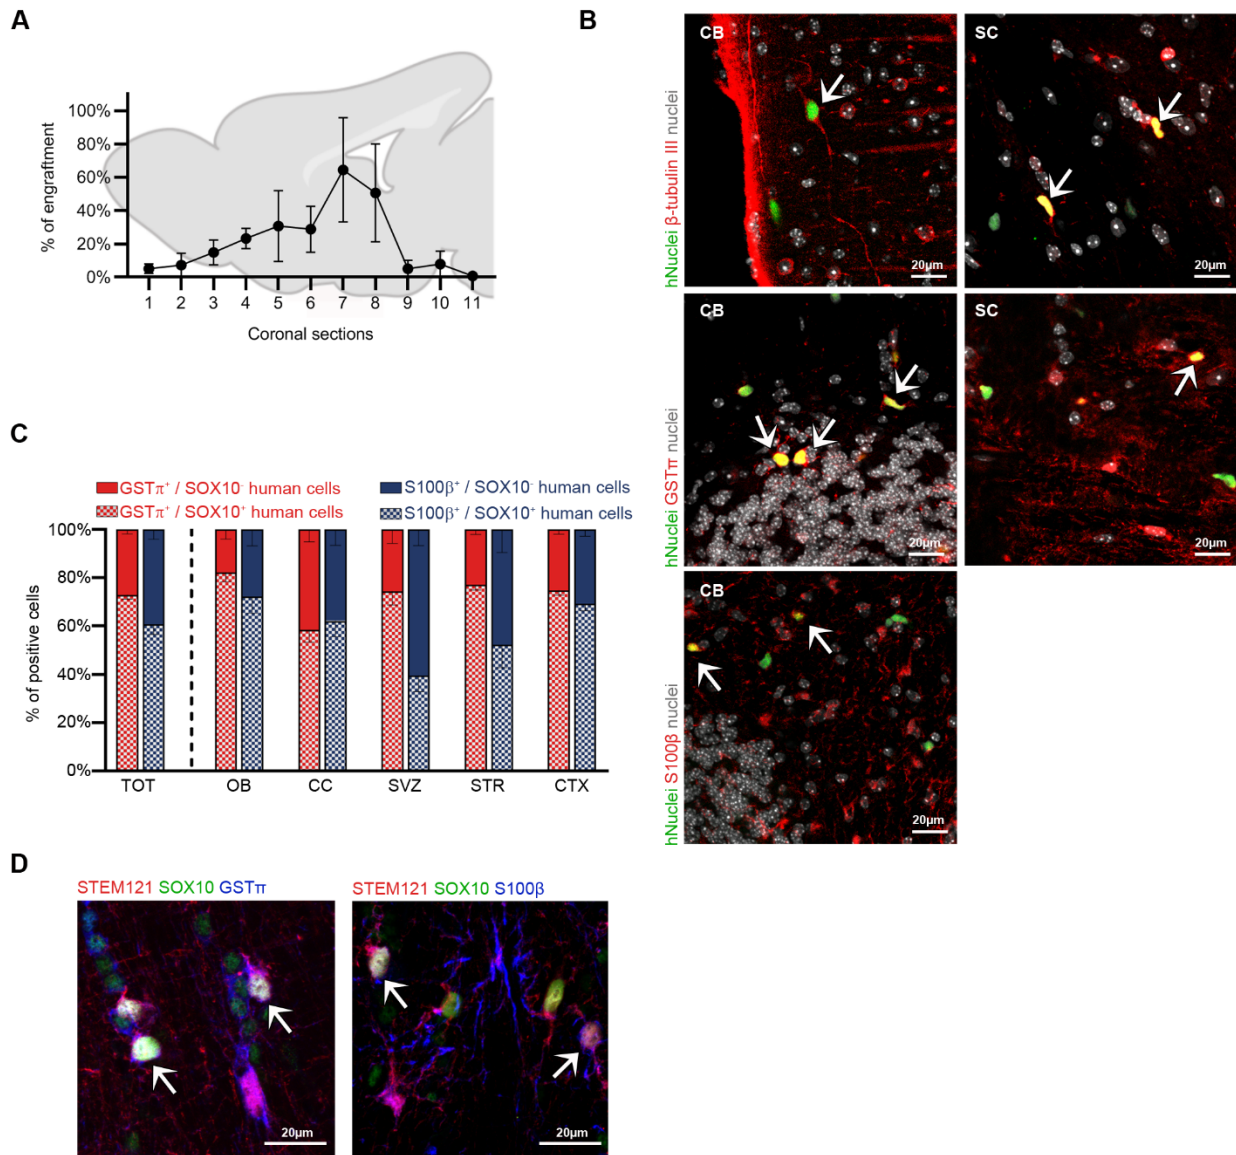

**Supplementary Figure 7. Engrafted hiPSC-NSCs migrate along the rostro-caudal axis and primarily differentiate into glia progenitors.** **A)** Graph showing the distribution of engrafted cells based along the rostro-caudal axis, evaluated as percentage of hNuclei $^+$  cells in sequential coronal sections. Data are represented as mean  $\pm$  SEM ( $n = 2$  mice, HD 2.2). **B)** Representative immunofluorescence images of human cells (hNuclei $^+$  or STEM121 $^+$ ) expressing S100 $\beta$  (astrocytes), GST $\pi$  (oligodendrocytes), or  $\beta$ -tubulin III (neurons) markers in the cerebellum (CB) or spinal cord (SC). Nuclei were counterstained with Hoechst. Arrows indicate co-localization between immunofluorescence signals. **C)** Bar plot showing the percentage of hiPSC-NSC-derived GST $\pi^+$  (red bars) or S100 $\beta^+$  (blue bars) cells co-expressing SOX10 marker (scattered bars). Percentages were calculated as: (number of STEM121 $^+$ GST $\pi^+$ Sox10 $^+$  or STEM121 $^+$ S100 $\beta^+$ Sox10 $^+$  cells) / (number of STEM121 $^+$ GST $\pi^+$  or STEM121 $^+$ S100 $\beta^+$  cells)  $\times$  100. Data are expressed as mean  $\pm$  SEM ( $n = 6$  mice). **D)** Representative immunofluorescence images of human cells (STEM121 $^+$ ; red) co-expressing SOX10 (green) and GST $\pi$  (blue) or SOX10 (green) and S100 $\beta$  (blue) (arrows). **A-D)** Transplanted hiPSC-NSC clones HD 1.1 (p2), HD 1.3 (p2), and HD 2.2 (p1-3). Source data are provided as a Source Data file.



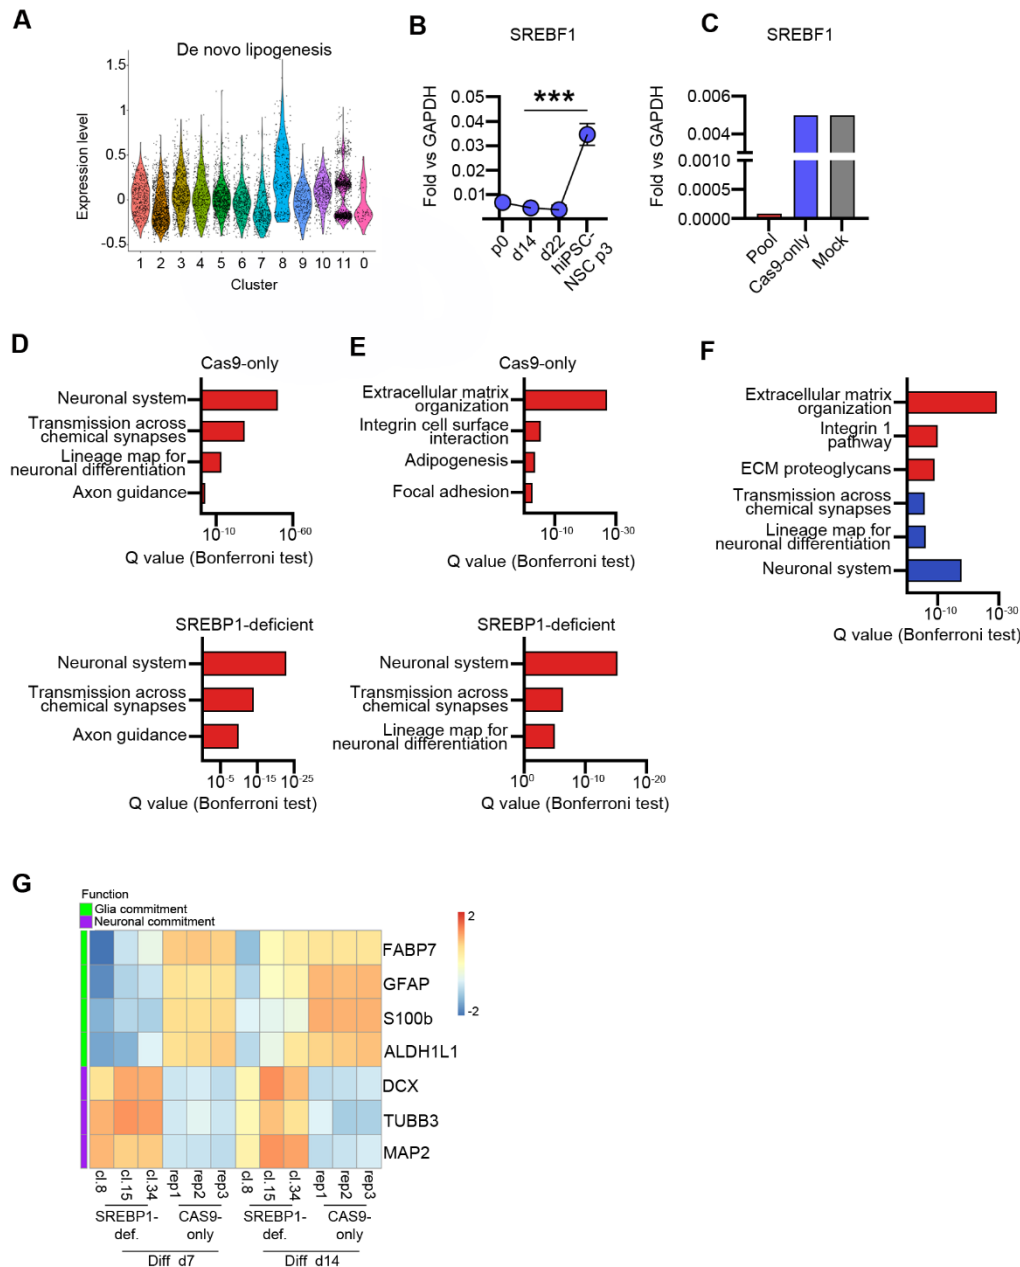

**Supplementary Figure 8. Molecular analyses in SREBP-1 deficient cells.** **A)** Seurat violin plots showing the expression levels in scRNA-seq clusters of the gene signature associated with *de novo* lipogenesis. **B)** Time-course qRT-PCR analysis of *SREBF1* expression during hiPSC-to-NSC differentiation. Timepoints analyzed: hiPSCs (day 0), rosette-like formations (day 14), hiPSC-NSC maturation (day 22), and hiPSC-NSCs at passage 3. Expression levels are normalized on the housekeeping gene *GAPDH*. Each dot represents the mean  $\pm$  SEM of 3 biological replicates/time point. One-way ANOVA followed by Dunn's multiple comparison test: \*\*\*,  $p < 0.001$ . **C)** Bar plot showing representative qRT-PCR data of the expression levels of *SREBF1* mRNA in pooled SREBP1 KO hiPSCs as compared to control cells treated only with Cas9 protein (Cas9 only) and untreated samples (Mock). Expression levels are normalized on the housekeeping gene *GAPDH*. **D)** Pathways upregulated in SREBP1-deficient and Cas9-only hiPSC-NSCs vs. hiPSCs (RNA-seq analyses). **E)** Pathways upregulated in SREBP1-deficient and Cas9-only hiPSC-NSCs vs. day 14 mixed glia/neuron cultures (RNA-seq analyses). **F)** Pathways upregulated (red bars) and downregulated (blue bars) in Cas9-only vs. SREBP1-def day 14 mixed glia/neuron cultures. **G)** Heatmap showing the expression levels in SREBP1-deficient and Cas9-only mixed glia/neuron cultures (day 7 and day 14) of glia and neuronal markers. Color scale indicates the relative fold change of normalized expression levels of these genes in each sample (blue, low; red, high) (RNA-seq analyses). Source data are provided as a Source Data file.



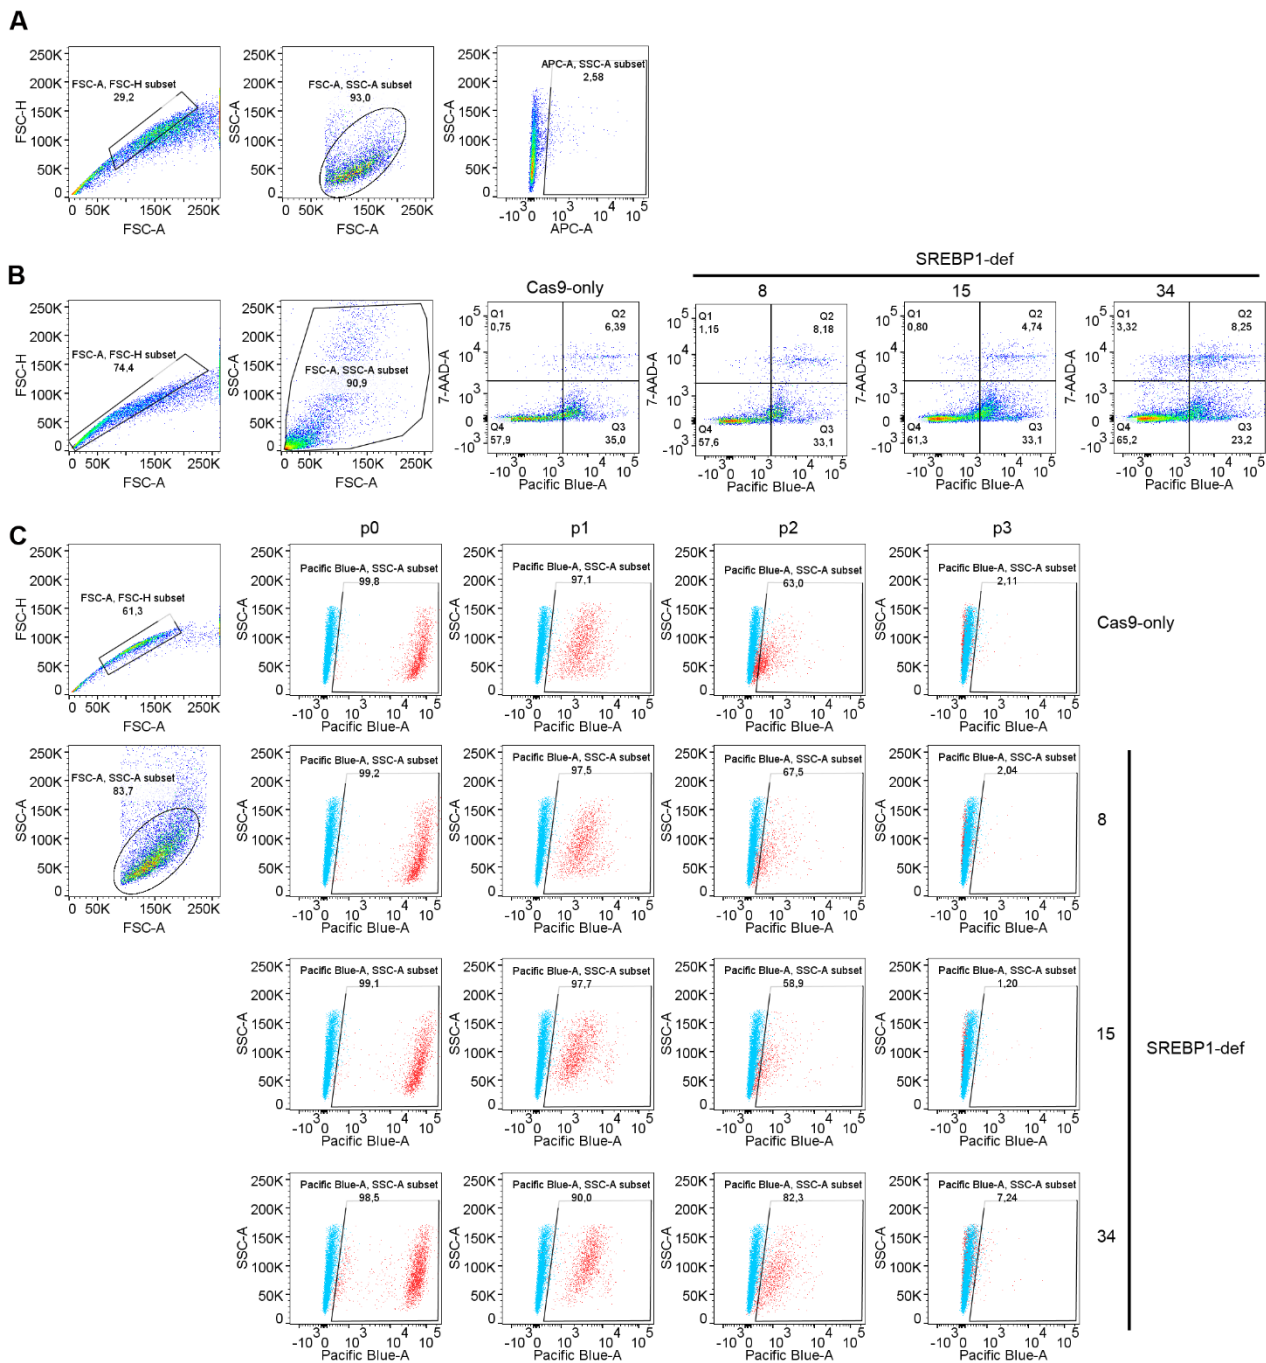

**Supplementary Figure 9. Sample gating strategies in flow cytometry analyses. A)** Sample gating strategy of plots reported in Supplementary Figure 1C. FSC-A/FSC-H gates were performed to select single cells and exclude doublets. FSC/SSC gates encompassed all live cells in the population to exclude debris. Unstained samples were used as negative controls to define the gate of SSEA4-APC labeled cells (see panel C of Suppl.Fig.1). **B)** Sample gating strategy related to data reported in Figure 7F. FSC-A/FSC-H gates were performed to select single cells and exclude doublets. Cells were stained with Annexin V and 7-AAD. Annexin V<sup>-</sup>/7-AAD<sup>-</sup> cells were positively selected as living cells, Annexin V<sup>+</sup>/7-AAD<sup>-</sup> cells as early apoptotic cells, and Annexin V<sup>+</sup>/7-AAD<sup>+</sup> cells as late apoptotic cells. Unstained samples were used as negative controls to define the gating strategy. Representative plots of stained Cas9-only and SREBP1-deficient hiPSC-NSCs are reported. **C)** Sample gating strategy related to data reported in Figure 7G. FSC-A/FSC-H gates were performed to select single cells and exclude doublets. FSC/SSC gates encompassed all live cells in the population to exclude debris. hiPSC-NSCs were stained with eBioscience™ Cell Proliferation Dye eFluor™ 450 and analyzed at different cell culture passages. For each analysis, the cytometer was calibrated using rainbow beads. Proliferating hiPSC-NSCs were identified in the SSC/Pacific Blue<sup>+</sup> gate. Unstained samples were used



as negative controls to define the gating strategy. Representative plots of Cas9-only and SREBP1-deficient hiPSC-NSCs stained at p0 and analyzed at p0-p3 to evaluate the proliferation rate.

## Supplementary Tables

**Supplementary Table 1. Summary of hiPSC clones generated by reprogramming of healthy donor (HD) fibroblasts.** Skin fibroblasts derived from adult (HD1) and newborn (HD2) healthy donors were transduced with a monocistronic Cre-excisable lentiviral vector (LV) carrying OCT4, SOX2, and KLF4 under the control of the human SFFV promoter, as previously reported<sup>34</sup>.

| ID  | Fibroblasts (code number/source) | Age     | hiPSC clones |
|-----|----------------------------------|---------|--------------|
| HD1 | FFF0561980 / Gaslini Biobank     | Adult   | HD 1.1       |
|     |                                  |         | HD 1.3       |
| HD2 | C0045C / Invitrogen              | Newborn | HD 2.2       |
|     |                                  |         | HD 2.3       |

**Supplementary Table 2. Upstream regulators identified by Ingenuity Pathway Analysis (IPA) on RNA-seq analysis of hiPSC-NPCs vs. hiPSCs.** IPA analysis identified the upstream regulators of genes up- or down-regulated during hiPSC neural commitment. Gene name (Upstream Regulator), the inferred activation states of predicted transcriptional regulators (Predicted Activation State), activation  $z$ -score ( $|z\text{-score}| > 2$ ) and the  $p$ -value of the overlap (Fisher's Exact Test) between the dataset genes and the genes that are regulated by an Upstream Regulator ( $p$ -value of overlap) are reported in the table.

| Upstream Regulator | Predicted Activation State | Activation $z$ -score | $p$ -value of overlap |
|--------------------|----------------------------|-----------------------|-----------------------|
| <i>RBL1</i>        | Activated                  | 2.556                 | 9.06E-07              |
| <i>FOXO3</i>       | Activated                  | 2.514                 | 6.49E-03              |
| <i>MEF2D</i>       | Activated                  | 2.480                 | 6.34E-04              |
| <i>NEUROD1</i>     | Activated                  | 3.261                 | 5.92E-03              |
| <i>CDKN2A</i>      | Activated                  | 3.688                 | 5.54E-07              |
| <i>KLF15</i>       | Activated                  | 2.295                 | 4.83E-02              |
| <i>HEY2</i>        | Activated                  | 2.006                 | 4.56E-03              |
| <i>SMARCB1</i>     | Activated                  | 2.146                 | 3.91E-08              |
| <i>ZBTB17</i>      | Activated                  | 2.219                 | 3.90E-03              |
| <i>HDAC1</i>       | Activated                  | 3.425                 | 3.25E-04              |
| <i>KDM5B</i>       | Activated                  | 3.102                 | 3.05E-06              |
| <i>OTX2</i>        | Activated                  | 2.550                 | 2.73E-02              |
| <i>TWIST1</i>      | Activated                  | 2.018                 | 2.72E-02              |
| <i>MXD1</i>        | Activated                  | 2.213                 | 2.29E-03              |
| <i>CREBBP</i>      | Activated                  | 2.339                 | 2.24E-04              |
| <i>EN1</i>         | Activated                  | 2.213                 | 2.23E-03              |
| <i>ZEB2</i>        | Activated                  | 2.080                 | 2.06E-04              |
| <i>PAX6</i>        | Activated                  | 2.837                 | 2.03E-02              |
| <i>ZEB1</i>        | Activated                  | 2.042                 | 1.99E-03              |
| <i>KDM5A</i>       | Activated                  | 2.194                 | 1.90E-02              |
| <i>NUPR1</i>       | Activated                  | 3.580                 | 1.71E-06              |
| <i>HDAC2</i>       | Activated                  | 3.115                 | 1.64E-03              |
| <i>SMARCA4</i>     | Activated                  | 2.073                 | 1.42E-06              |
| <i>E2F6</i>        | Activated                  | 2.688                 | 1.25E-06              |
| <i>FOXN4</i>       | Activated                  | 2.236                 | 1.21E-04              |
| <i>TCF3</i>        | Activated                  | 2.461                 | 1.07E-02              |
| <i>E2F1</i>        | Inhibited                  | -4.041                | 1.89E-15              |
| <i>MYCN</i>        | Inhibited                  | -3.976                | 2.60E-04              |
| <i>POU5F1</i>      | Inhibited                  | -3.589                | 9.00E-06              |
| <i>CCND1</i>       | Inhibited                  | -2.852                | 7.74E-15              |
| <i>NANOG</i>       | Inhibited                  | -2.470                | 9.34E-06              |
| <i>MYCBP</i>       | Inhibited                  | -2.000                | 1.69E-02              |

|               |           |        |          |
|---------------|-----------|--------|----------|
| <i>MYC</i>    | Inhibited | -6.979 | 3.59E-10 |
| <i>E2F3</i>   | Inhibited | -4.397 | 7.50E-10 |
| <i>TAL1</i>   | Inhibited | -3.471 | 2.24E-05 |
| <i>SMAD7</i>  | Inhibited | -3.415 | 1.53E-02 |
| <i>MAX</i>    | Inhibited | -2.902 | 1.83E-04 |
| <i>TRIM24</i> | Inhibited | -2.828 | 2.37E-02 |
| <i>REST</i>   | Inhibited | -2.698 | 2.30E-04 |
| <i>BMI1</i>   | Inhibited | -2.607 | 4.86E-04 |
| <i>EPAS1</i>  | Inhibited | -2.408 | 1.35E-05 |
| <i>ZNF217</i> | Inhibited | -2.385 | 1.28E-06 |
| <i>POU4F2</i> | Inhibited | -2.359 | 4.04E-05 |
| <i>E2F2</i>   | Inhibited | -2.325 | 2.89E-09 |
| <i>MNT</i>    | Inhibited | -2.236 | 1.68E-03 |
| <i>SIN3A</i>  | Inhibited | -2.236 | 3.58E-03 |
| <i>ZIC2</i>   | Inhibited | -2.219 | 8.50E-03 |
| <i>HNF1B</i>  | Inhibited | -2.205 | 2.08E-04 |
| <i>MED1</i>   | Inhibited | -2.197 | 1.20E-07 |
| <i>HAND2</i>  | Inhibited | -2.139 | 2.36E-02 |
| <i>TFAP2C</i> | Inhibited | -2.094 | 6.53E-03 |
| <i>HOXA10</i> | Inhibited | -2.063 | 3.41E-03 |
| <i>MYCL</i>   | Inhibited | -2.000 | 3.19E-03 |

**Supplementary Table 3. Upstream regulators identified by Ingenuity Pathway Analysis (IPA) on the dataset of genes close to hiPSC- and hiPSC-NSC-specific enhancers.** IPA analysis of integrated ChIP-seq and RNA-seq datasets identified the upstream regulators of genes associated with gained and lost enhancers (400 kb window) in hiPSC-NSCs. Gene name (Upstream Regulator), the inferred activation states of predicted transcriptional regulators (Predicted Activation State), activation z-score ( $|z\text{-score}| > 2$ ) and the *p*-value of the overlap between the dataset genes and the genes that are regulated by an Upstream Regulator (*p*-value of overlap - Fisher's Exact Test) are reported in the table.

| Upstream Regulator | Predicted Activation State | Activation z-score | <i>p</i> -value of overlap |
|--------------------|----------------------------|--------------------|----------------------------|
| <i>NONO</i>        | Activated                  | 2.711              | 4.17E-04                   |
| <i>SREBF1</i>      | Activated                  | 3.215              | 6.41E-04                   |
| <i>STAT1</i>       | Activated                  | 3.416              | 9.59E-04                   |
| <i>EHMT1</i>       | Activated                  | 3.162              | 2.16E-02                   |
| <i>CTNNB1</i>      | Activated                  | 2.425              | 2.38E-02                   |
| <i>RELA</i>        | Activated                  | 2.534              | 3.77E-02                   |
| <i>TEAD2</i>       | Activated                  | 2.236              | 4.12E-02                   |
| <i>E2F1</i>        | Inhibited                  | -3.022             | 9.23E-19                   |
| <i>ATF3</i>        | Inhibited                  | -3.281             | 1.54E-10                   |
| <i>MYCN</i>        | Inhibited                  | -2.599             | 2.71E-09                   |
| <i>MYC</i>         | Inhibited                  | -4.925             | 2.37E-08                   |
| <i>E2F3</i>        | Inhibited                  | -3.160             | 3.08E-08                   |
| <i>MITF</i>        | Inhibited                  | -4.914             | 8.61E-08                   |
| <i>TP63</i>        | Inhibited                  | -3.261             | 2.87E-07                   |
| <i>YAP1</i>        | Inhibited                  | -3.334             | 1.77E-06                   |
| <i>MYBL2</i>       | Inhibited                  | -2.425             | 4.49E-05                   |
| <i>MED1</i>        | Inhibited                  | -4.069             | 6.66E-05                   |
| <i>PAX8</i>        | Inhibited                  | -2.392             | 8.77E-05                   |
| <i>TFAP2C</i>      | Inhibited                  | -2.178             | 1.23E-04                   |
| <i>HIF1A</i>       | Inhibited                  | -4.095             | 1.66E-04                   |

|                |           |        |          |
|----------------|-----------|--------|----------|
| <i>MYB</i>     | Inhibited | -2.615 | 2.94E-04 |
| <i>SP1</i>     | Inhibited | -2.559 | 3.51E-04 |
| <i>FOXM1</i>   | Inhibited | -3.917 | 4.40E-04 |
| <i>NCOA3</i>   | Inhibited | -3.136 | 4.61E-04 |
| <i>EPAS1</i>   | Inhibited | -2.931 | 6.68E-04 |
| <i>TCF4</i>    | Inhibited | -4.382 | 8.83E-04 |
| <i>ZNF281</i>  | Inhibited | -2.200 | 1.03E-03 |
| <i>MYCBP</i>   | Inhibited | -2.000 | 1.20E-03 |
| <i>FUS</i>     | Inhibited | -2.236 | 1.26E-03 |
| <i>POU5F1</i>  | Inhibited | -2.646 | 1.26E-03 |
| <i>WWTR1</i>   | Inhibited | -2.178 | 1.44E-03 |
| <i>ID1</i>     | Inhibited | -2.425 | 3.91E-03 |
| <i>RELB</i>    | Inhibited | -2.376 | 4.58E-03 |
| <i>GATA4</i>   | Inhibited | -2.476 | 5.22E-03 |
| <i>CREB1</i>   | Inhibited | -2.813 | 7.60E-03 |
| <i>KDM3A</i>   | Inhibited | -2.595 | 8.50E-03 |
| <i>NFKB1</i>   | Inhibited | -3.273 | 1.06E-02 |
| <i>MYOCD</i>   | Inhibited | -2.466 | 1.31E-02 |
| <i>NANOG</i>   | Inhibited | -2.359 | 1.38E-02 |
| <i>EZH2</i>    | Inhibited | -2.335 | 2.45E-02 |
| <i>SRF</i>     | Inhibited | -2.219 | 2.79E-02 |
| <i>CTNNB1</i>  | Inhibited | -2.888 | 3.02E-02 |
| <i>SMARCA4</i> | Inhibited | -4.526 | 3.30E-02 |
| <i>POU2F2</i>  | Inhibited | -3.162 | 3.43E-02 |
| <i>STAT3</i>   | Inhibited | -3.407 | 4.86E-02 |

**Supplementary Table 4. Upstream regulators identified by Ingenuity Pathway Analysis (IPA) on RNA-seq analysis of hiPSC-NSCs vs. hfNSCs.** IPA analysis identified the upstream regulators of genes upregulated in hiPSC-NSCs ( $z$ -score  $> 2$ ) or hfNSCs ( $z$ -score  $< 2$ ). Gene name (Upstream Regulator), the inferred activation states of predicted transcriptional regulators (Predicted Activation State), activation  $z$ -score, and the  $p$ -value of the overlap between the dataset genes and the genes that are regulated by an Upstream Regulator ( $p$ -value of overlap, Fisher's Exact Test) are reported in the table.

| Upstream Regulator | Predicted Activation State | Activation $z$ -score | $p$ -value of overlap |
|--------------------|----------------------------|-----------------------|-----------------------|
| <i>NKX2-3</i>      | Activated                  | 4.633                 | 1.33E-11              |
| <i>CTNNB1</i>      | Activated                  | 4.249                 | 3.83E-22              |
| <i>NEUROG3</i>     | Activated                  | 3.977                 | 2.81E-04              |
| <i>MYC</i>         | Activated                  | 3.853                 | 1.14E-08              |
| <i>TRIM24</i>      | Activated                  | 3.429                 | 2.66E-05              |
| <i>KLF4</i>        | Activated                  | 3.158                 | 3.56E-08              |
| <i>HIF1A</i>       | Activated                  | 3.123                 | 1.41E-08              |
| <i>SMAD3</i>       | Activated                  | 3.098                 | 3.52E-04              |
| <i>HOXA9</i>       | Activated                  | 3.065                 | 3.12E-04              |
| <i>SRF</i>         | Activated                  | 2.989                 | 1.51E-05              |
| <i>SOX11</i>       | Activated                  | 2.784                 | 4.04E-05              |
| <i>ATF4</i>        | Activated                  | 2.692                 | 4.71E-04              |
| <i>KMT2D</i>       | Activated                  | 2.571                 | 1.79E-04              |
| <i>HDAC6</i>       | Activated                  | 2.547                 | 1.07E-02              |
| <i>NOTCH3</i>      | Activated                  | 2.456                 | 1.16E-02              |
| <i>GFII</i>        | Activated                  | 2.397                 | 5.45E-03              |
| <i>HNFI1A</i>      | Activated                  | 2.380                 | 2.41E-03              |
| <i>LEF1</i>        | Activated                  | 2.355                 | 2.50E-03              |

|                    |           |        |          |
|--------------------|-----------|--------|----------|
| <i>GLI1</i>        | Activated | 2.346  | 3.90E-09 |
| <i>LHX1</i>        | Activated | 2.340  | 1.17E-04 |
| <i>STAT3</i>       | Activated | 2.303  | 9.38E-09 |
| <i>LMX1B</i>       | Activated | 2.219  | 2.85E-03 |
| <i>SIM1</i>        | Activated | 2.213  | 1.66E-06 |
| <i>MAML1</i>       | Activated | 2.173  | 2.53E-02 |
| <i>SIX5</i>        | Activated | 2.170  | 3.60E-04 |
| <i>CDX1</i>        | Activated | 2.164  | 4.44E-02 |
| <i>CEBPB</i>       | Activated | 2.162  | 4.43E-02 |
| <i>EGR2</i>        | Activated | 2.158  | 5.51E-04 |
| <i>SMAD4</i>       | Activated | 2.101  | 1.65E-07 |
| <i>ARNT2</i>       | Activated | 2.101  | 1.35E-06 |
| <i>FOXO1</i>       | Activated | 2.030  | 1.81E-05 |
| <i>OTX2</i>        | Activated | 2.026  | 3.38E-04 |
| <i>POU3F2</i>      | Activated | 2.000  | 1.79E-02 |
| <i>LMX1A</i>       | Activated | 2.000  | 1.27E-02 |
| <i>GLIS1</i>       | Activated | 2.000  | 2.35E-03 |
| <i>IRF7</i>        | Inhibited | -3.331 | 3.14E-04 |
| <i>PAX1</i>        | Inhibited | -3.207 | 6.77E-03 |
| <i>TFEB</i>        | Inhibited | -3.153 | 4.73E-04 |
| <i>NLRC5</i>       | Inhibited | -3.113 | 2.77E-04 |
| <i>REST</i>        | Inhibited | -3.010 | 5.73E-18 |
| <i>STAT2</i>       | Inhibited | -2.721 | 1.07E-03 |
| <i>IRF1</i>        | Inhibited | -2.658 | 1.46E-02 |
| <i>PRDM8</i>       | Inhibited | -2.646 | 7.30E-04 |
| <i>SOX3</i>        | Inhibited | -2.475 | 1.87E-09 |
| <i>COMMD3-BMI1</i> | Inhibited | -2.379 | 1.74E-04 |
| <i>TP53</i>        | Inhibited | -2.254 | 2.19E-16 |
| <i>HOXC9</i>       | Inhibited | -2.236 | 1.79E-02 |
| <i>GATA3</i>       | Inhibited | -2.203 | 2.16E-02 |
| <i>GMNN</i>        | Inhibited | -2.191 | 3.41E-07 |
| <i>SOX1</i>        | Inhibited | -2.191 | 2.04E-08 |
| <i>SPDEF</i>       | Inhibited | -2.165 | 2.14E-07 |
| <i>ZNF217</i>      | Inhibited | -2.065 | 2.31E-07 |
| <i>NFKB1</i>       | Inhibited | -2.009 | 7.44E-03 |

**Supplementary Table 5. List of gRNAs and primers used for PCR amplification and sequencing of Cas9 on-target sequence. Sequencing results showing the Cas9-nuclease edited sequences (*SREBF1* exon 5) in SREBP1-deficient clones.**

| gRNA               |                                                                                      |
|--------------------|--------------------------------------------------------------------------------------|
| gRNA1              | GAGCTCAAGGATCTGGTGGT                                                                 |
| gRNA2              | TGCGCTTCTCTCCACGGCTC                                                                 |
| gRNA3              | CGGAGAAGCTGCCTATCAAC                                                                 |
| Sequencing primers |                                                                                      |
| FW                 | 5'-TAGCACAGCCCCACCTTTAT-3'                                                           |
| Rev                | 5'-AGCCATGAAGACAGACGGAG-3'                                                           |
| Clone              | Edited on-target sequence ( <i>SREBF1</i> exon 5)                                    |
| 8                  | CCACACCTTTGCCTCAGTGCCAC -----<br>C---134bp deletion--<br> GATAGGCAGCTTCTCCGCATCTACG  |
| 15                 | CCACACCTTTGCCTCAGTGCCACC -----<br>C---134bp deletion--<br> GATAGGCAGCTTCTCCGCATCTACG |

|    |                                                                                 |
|----|---------------------------------------------------------------------------------|
| 34 | CCACACCTTTGCCTCAGTGCCACAC ---<br>134bp deletion--<br> GATAGGCAGCTTCTCCGCATCTACG |
|----|---------------------------------------------------------------------------------|

**Supplementary Table 6. List of primers used for qRT-PCR on immunoprecipitated chromatin.**

| Primers for ChIP analysis |                                  |
|---------------------------|----------------------------------|
| Region                    | Sequence                         |
| Negative                  | Fw 5' -AAAGCTGGACTGGTGAATGC- 3'  |
|                           | Rev 5' -TCAAAGGCTCATCTTTGCAG- 3' |
| <i>FGFR1</i>              | Fw 5' -GTCACAGCTGCCATCCTACA- 3'  |
|                           | Rev 5' -TCTATTTGGGGACTCCGAGA- 3' |
| <i>LIN28</i>              | Fw 5' -CTCAGCAGTGGATGGGGATG- 3'  |
|                           | Rev 5' -GCAGGAGGAACCCAAAGAGT- 3' |
| <i>PPAP2B</i>             | Fw 5' -TGAGCATCGCTTTTCTGGGG- 3'  |
|                           | Rev 5' -ACAGCTTGCTACGAGACAGG- 3' |

**Supplementary Table 7. List of primers and probes used for SYBR Green and TaqMan qRT-PCR.**

| SYBR Green primers |                                     |
|--------------------|-------------------------------------|
| Gene               | Sequence                            |
| <i>PAX6</i>        | Fw 5' -AGTGAATCAGCTCGGTGGTGTCTT- 3' |
|                    | Rev 5' -TGCAGAATTCGGGAAATGTTCG- 3'  |
| <i>ROBO2</i>       | Fw 5' -TTCTTCTTGCGCATCGTGC- 3'      |
|                    | Rev 5' -CGCATTTGCGACTCACTGCTTC- 3'  |
| <i>OCT4</i>        | Fw 5' -TCGAGAACCGAGTGAGAGG- 3'      |
|                    | Rev 5' -GAACCACACTCGGACCACA- 3'     |
| <i>NANOG</i>       | Fw 5' -ATGCCTCACACGGAGACTGT- 3'     |
|                    | Rev 5' -AAGTGGGTTGTTTGCCTTTG- 3'    |
| <i>LIN28</i>       | Fw 5' -GAAGCGCAGATCAAAAGGAG- 3'     |
|                    | Rev 5' -GCTGATGCTCTGGCAGAAGT- 3'    |
| TaqMan probes      |                                     |
| Gene               | Code                                |
| <i>PAX6</i>        | Hs00240871 m1                       |
| <i>NEUROD1</i>     | Hs01922995 s1                       |
| <i>MXD1</i>        | Hs00965581 m1                       |
| <i>MAX</i>         | Hs00231142 m1                       |
| <i>MYC</i>         | Hs00153408 m1                       |
| <i>SREBF1</i>      | Hs01088691 m1                       |
| <i>ZEB1</i>        | Hs00232783 m1                       |
| <i>GAPDH</i>       | Hs99999909 m1                       |
| <i>NKX2-2</i>      | Hs00159616 m1                       |
| <i>NR3C2</i>       | Hs01031804 m1                       |
| <i>GRHL1</i>       | Hs01119372 m1                       |
| <i>MEIS1</i>       | Hs00180020 m1                       |
| <i>PPARA</i>       | Hs00947536 m1                       |
| <i>CREB5</i>       | Hs00191719 m1                       |
| <i>POU3F2</i>      | Hs00271595 s1                       |
| <i>ZNF711</i>      | Hs00944896 m1                       |
| <i>NPAS2</i>       | Hs00231212 m1                       |
| <i>RXRβ</i>        | Hs00232774 m1                       |
| <i>IRF2</i>        | Hs01082884 m1                       |
| <i>JUN</i>         | Hs01103582 s1                       |
| <i>ARNT</i>        | Hs01121918 m1                       |
| <i>MEF2A</i>       | Hs01050406 g1                       |
| <i>FOXA1</i>       | Hs04187555 m1                       |
| <i>NR3C1</i>       | Hs00353740 m1                       |
| <i>TRIM3</i>       | Hs01548703 m1                       |

|              |               |
|--------------|---------------|
| <i>ARNT2</i> | Hs00977663 ml |
| <i>HES1</i>  | Hs00172878 ml |
| <i>NUPR1</i> | Hs01044304 gl |
| <i>FOXN4</i> | Hs01566111 ml |
| <i>FOXG1</i> | Hs01850784 sl |

**Supplementary Table 8. List of primary and secondary antibodies with antigen, host species, provider, product number, and working dilutions indicated.**

|                      | <b>Primary Antibodies</b>                       |                         |
|----------------------|-------------------------------------------------|-------------------------|
| <b>Antigen</b>       | <b>Host species (provider, product number)</b>  | <b>Working Dilution</b> |
| MAP2                 | Mouse IgG1 (Immunological Science, MAB10334)    | 1:300                   |
| GFAP                 | Mouse monoclonal IgG1 (Millipore, MAB3402)      | 1:1000                  |
| Human Nuclei         | Mouse monoclonal (Sigma-Aldrich, MAB1281)       | 1:100                   |
| STEM121              | Mouse monoclonal (Takara Bio, Y40410)           | 1:100                   |
| Human Mitochondria   | Mouse monoclonal (Millipore, MAB1273)           | 1:100                   |
| GST $\pi$            | Rabbit polyclonal (MBL, 312)                    | 1:500                   |
| SOX10                | Goat polyclonal IgG (R&D Systems, AF2864)       | 1:100                   |
| $\beta$ -tubulin III | Rabbit polyclonal IgG (BioLegend, 802001)       | 1:2000                  |
| S100 $\beta$         | Rabbit (Swant, 37A/ Proteintech, 15146-1-ap)    | 1:1000                  |
| Human Nestin         | Rabbit polyclonal (Millipore, ABD69)            | 1:200                   |
| Ki67 (D3B5)          | Rabbit monoclonal IgG (Cell Signaling, MAB9129) | 1:200                   |
| Ki67                 | Mouse polyclonal (Novocastra, NCL-Ki67-MM1)     | 1:100                   |
|                      | <b>Secondary antibodies</b>                     |                         |
| Alexa 488            | Goat anti-Mouse IgG (Mol Probes, A11001)        | 1:1000                  |
| Alexa 488            | Donkey anti-Goat IgG (Mol Probes, A11055)       | 1:1000                  |
| Alexa 546            | Goat anti-Rabbit IgG (Mol Probes, A11010)       | 1:2000                  |
| Cy3                  | Donkey anti-Mouse IgG (Millipore, AP192C)       | 1:1000                  |
| Alexa 647            | Donkey anti-Rabbit IgG (Invitrogen, A31573)     | 1:500                   |
|                      | <b>Nuclear Counterstain</b>                     |                         |
| Hoechst 33342        | (Invitrogen, H3570)                             | 1:1000                  |
